# Supplementary material for: A Rapid and Cheap Method for Extracting and Quantifying Lycopene Content in Tomato Sauces: Effects of Lycopene Micellar Delivery on Human Osteoblast-Like Cells
Source: MDPI journal article supplement (doi:10.3390/nu14030717), 2022-02-08
Supplement: s1 [file s1]

# Chromatogram Information

User Name Administrator  
 Date Modified 1/21/2022 1:38:43 PM  
 Description  
 HPLC System Name HPLC  
 Injection Date 11/14/2019 3:17:22 PM  
 Volume 10.0 [μL]  
 Sample # 7  
 Project Name Lycopene Ros Mar  
 Acquisition Time 45.0 [min]  
 Acquisition Sequence Linearity Lycopene  
 Control Method Lycopene extract  
 Peak ID Table Lycopene  
 Calibration Method Lycopene low  
 Additional Information  
 Column Info

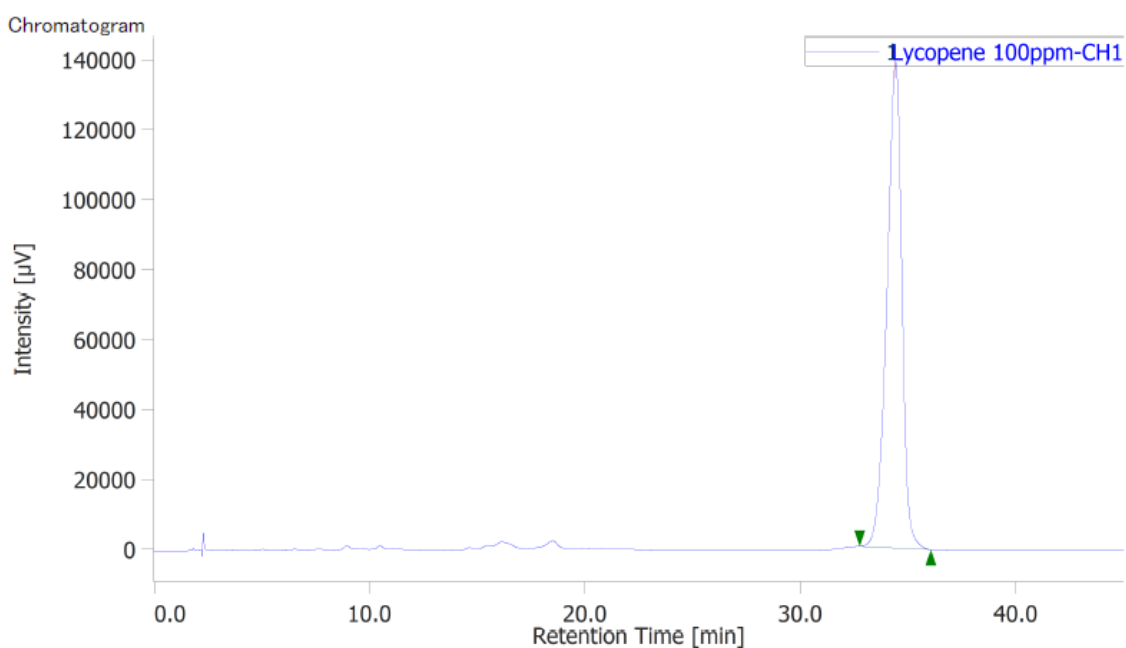

## Peak Information

| #     | Peak Name | CH | tR [min] | Area [μV-sec] | Height [μV] | Area%   | Height% | Quantity | NTP   | Resolution | Symmetry Factor | Warning |
|-------|-----------|----|----------|---------------|-------------|---------|---------|----------|-------|------------|-----------------|---------|
| 1     | Lycopene  | 1  | 34.407   | 6750886       | 138918      | 100.000 | 100.000 | N/A      | 12163 | N/A        | 0.866           |         |
| Total |           |    |          | 6750886       | 138918      |         |         | 0.00000  |       |            |                 |         |

**Figure S1.** HPLC chromatogram of pure standard *all-trans* lycopene. Retention time was almost 35 minutes.

A

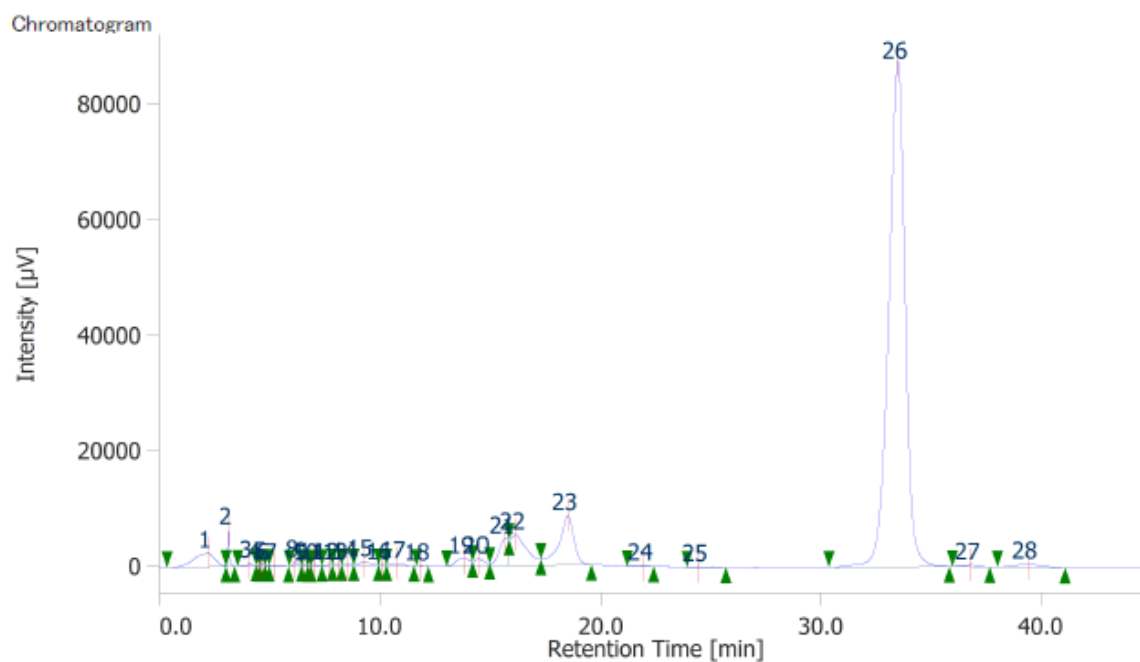

## Peak Information

| #     | Peak Name | CH | tR [min] | Area [µV·sec] | Height [µV] | Area%  | Height% | Quantity      | NTP   | Resolution | Symmetry Factor | Warning |
|-------|-----------|----|----------|---------------|-------------|--------|---------|---------------|-------|------------|-----------------|---------|
| 26    | Lycopene  | 1  | 33.497   | 4527985       | 87543       | 78.177 | 70.814  | 70.0873 [ppm] | 10458 | 2.530      | 0.902           |         |
| Total |           |    |          | 5791998       | 123622      |        |         | 70.0873       |       |            |                 |         |

B

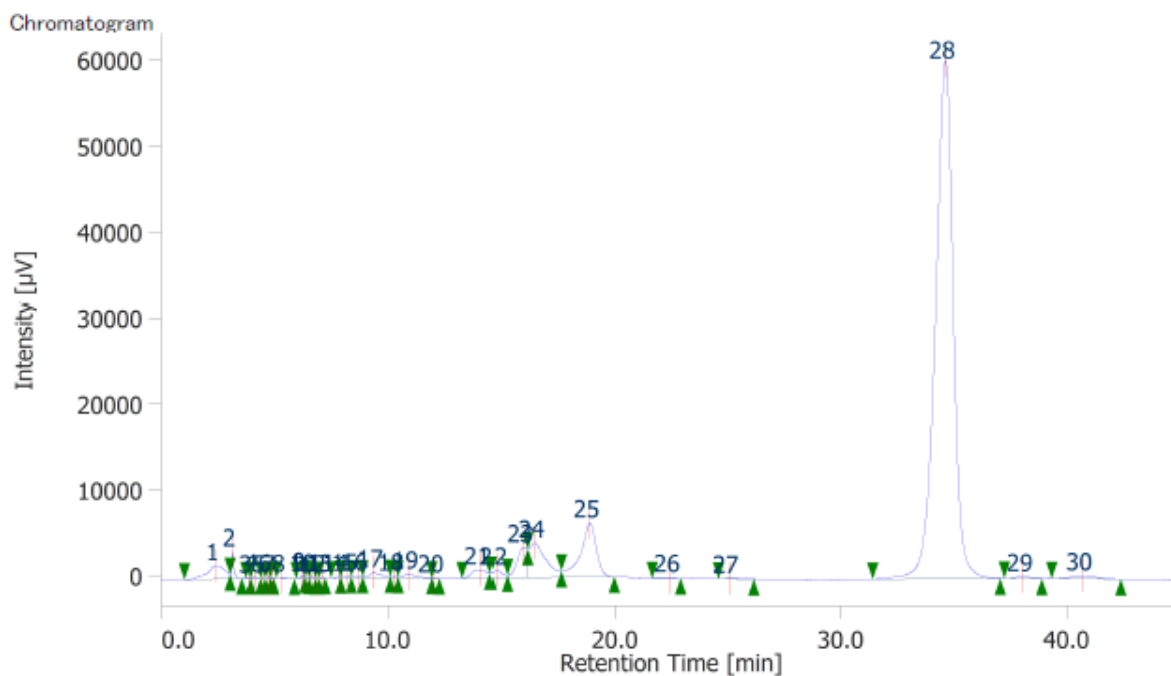

## Peak Information

| #     | Peak Name | CH | tR [min] | Area [µV·sec] | Height [µV] | Area%  | Height% | Quantity      | NTP   | Resolution | Symmetry Factor | Warning |
|-------|-----------|----|----------|---------------|-------------|--------|---------|---------------|-------|------------|-----------------|---------|
| 28    | Lycopene  | 1  | 34.623   | 3305033       | 60204       | 78.578 | 71.475  | 51.3322 [ppm] | 10057 | 2.534      | 0.897           |         |
| Total |           |    |          | 4206053       | 84233       |        |         | 51.3322       |       |            |                 |         |

C

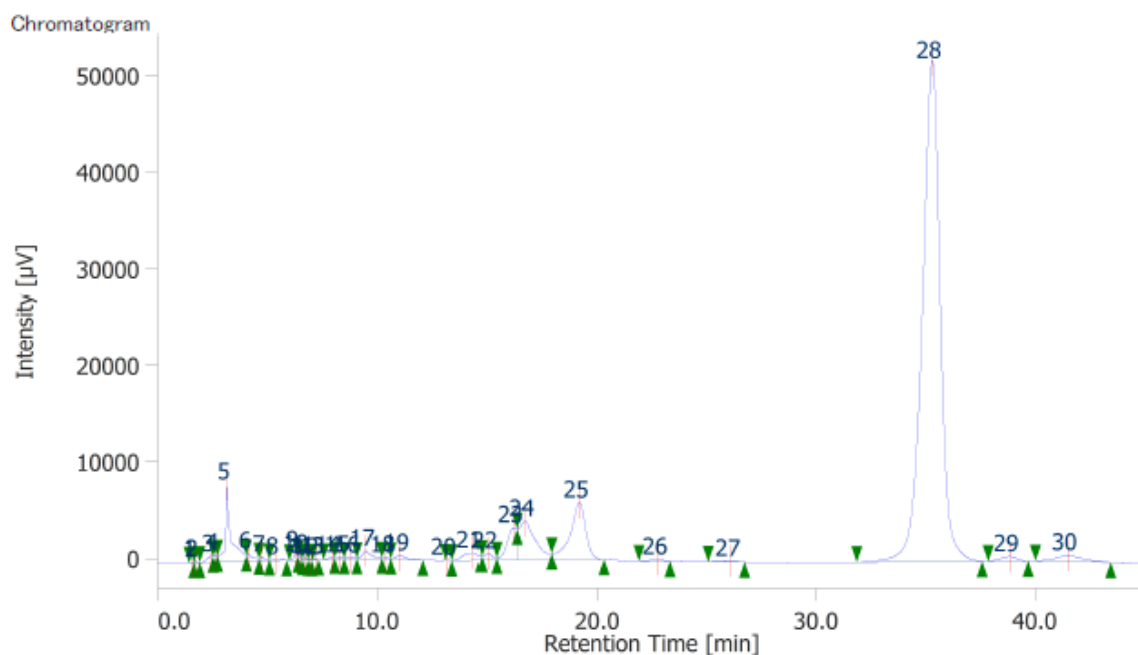

## Peak Information

| #     | Peak Name | CH | tR [min] | Area [µV·sec] | Height [µV] | Area%  | Height% | Quantity      | NTP  | Resolution | Symmetry Factor | Warning       |
|-------|-----------|----|----------|---------------|-------------|--------|---------|---------------|------|------------|-----------------|---------------|
| 28    | Lycopene  | 1  | 35.297   | 2963331       | 51878       | 74.720 | 62.758  | 46.0919 [ppm] | 9943 | 2.516      | 0.912           | Extrapolation |
| Total |           |    |          | 3965913       | 82664       |        |         | 46.0919       |      |            |                 |               |

D

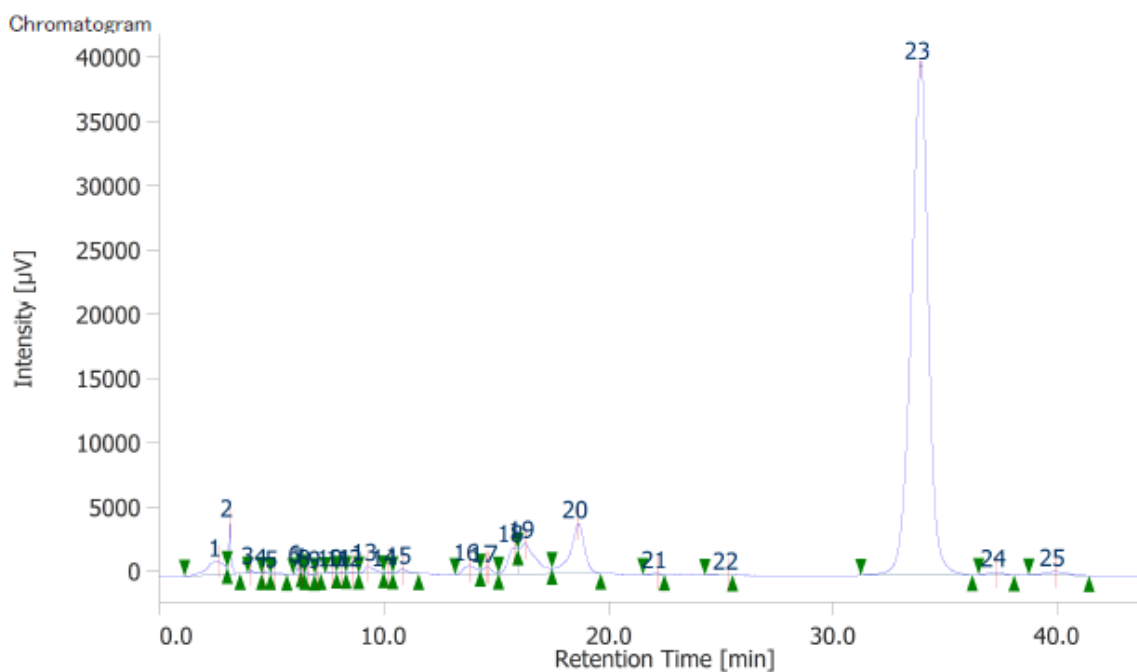

## Peak Information

| #     | Peak Name | CH | tR [min] | Area [µV·sec] | Height [µV] | Area%  | Height% | Quantity      | NTP   | Resolution | Symmetry Factor | Warning       |
|-------|-----------|----|----------|---------------|-------------|--------|---------|---------------|-------|------------|-----------------|---------------|
| 23    | Lycopene  | 1  | 33.913   | 2122061       | 39943       | 79.294 | 68.856  | 33.1902 [ppm] | 10145 | 2.703      | 0.917           | Extrapolation |
| Total |           |    |          | 2676189       | 58009       |        |         | 33.1902       |       |            |                 |               |

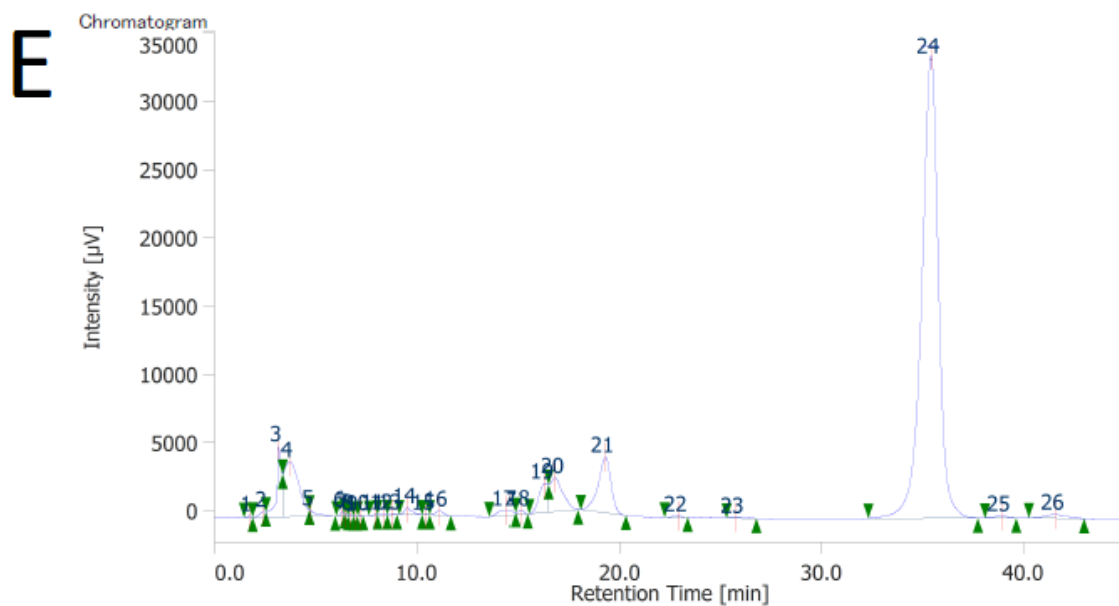

Peak Information

| #     | Peak Name | CH | tR [min] | Area [μV·sec] | Height [μV] | Area%  | Height% | Quantity      | NTP   | Resolution | Symmetry Factor | Warning       |
|-------|-----------|----|----------|---------------|-------------|--------|---------|---------------|-------|------------|-----------------|---------------|
| 24    | Lycopene  | 1  | 35.423   | 1953468       | 33887       | 72.085 | 60.861  | 30.6047 [ppm] | 10005 | 2.607      | 0.891           | Extrapolation |
| Total |           |    |          | 2709951       | 55680       |        |         | 30.6047       |       |            |                 |               |

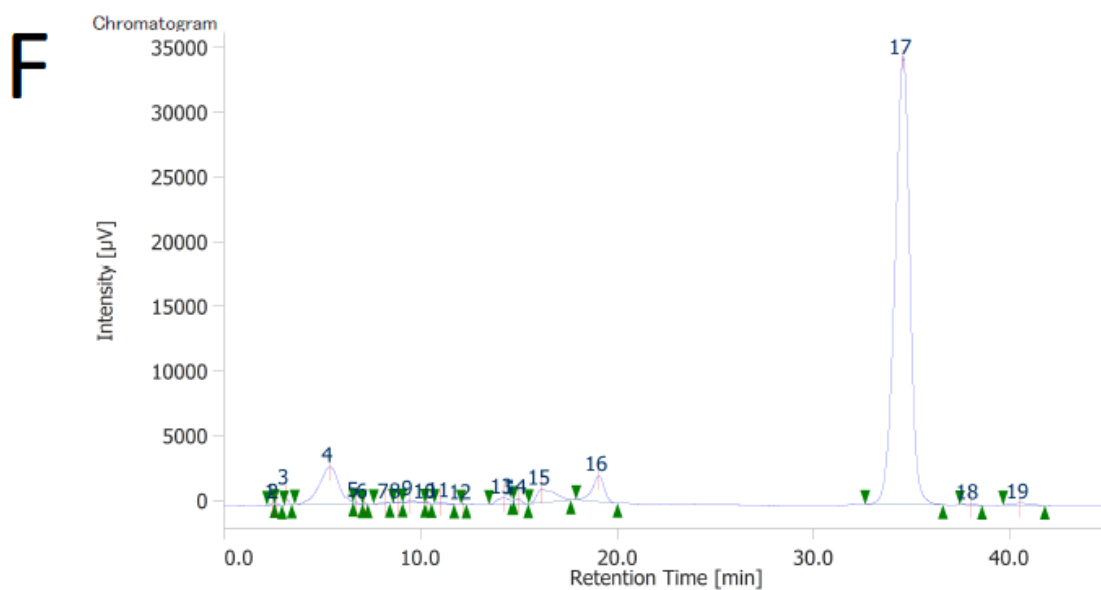

Peak Information

| #     | Peak Name | CH | tR [min] | Area [μV·sec] | Height [μV] | Area%  | Height% | Quantity      | NTP   | Resolution | Symmetry Factor | Warning       |
|-------|-----------|----|----------|---------------|-------------|--------|---------|---------------|-------|------------|-----------------|---------------|
| 17    | Lycopene  | 1  | 34.577   | 1834170       | 34642       | 81.569 | 78.818  | 28.7752 [ppm] | 10233 | 2.801      | 0.914           | Extrapolation |
| Total |           |    |          | 2248605       | 43953       |        |         | 28.7752       |       |            |                 |               |

**Figure S2.** Single HPLC chromatograms of sauces analysis. Main peak after ~35 minutes represented *all-trans* lycopene. Data represent in decreasing order of lycopene content Osteocol sauce (panel A), Sauce#1 (panel B), Sauce#2 (panel C), Sauce#3 (panel D), Sauce#4 (panel E), Sauce#5 (panel F).

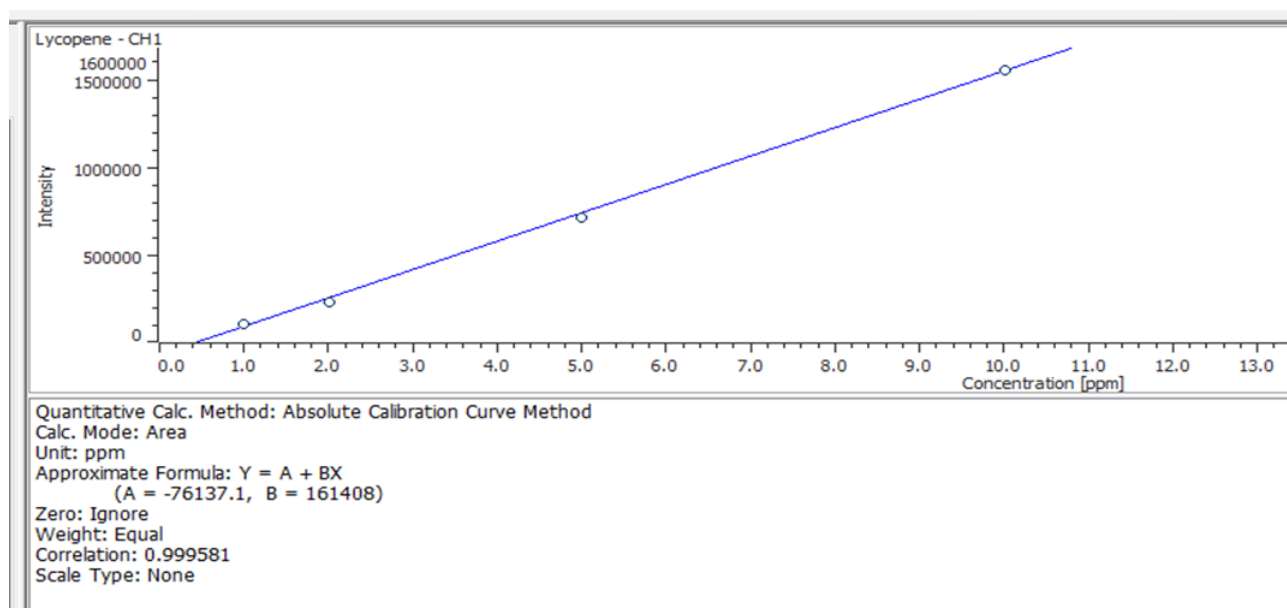

**Figure S3.** HPLC calibration curve (1-10 ppm concentration).

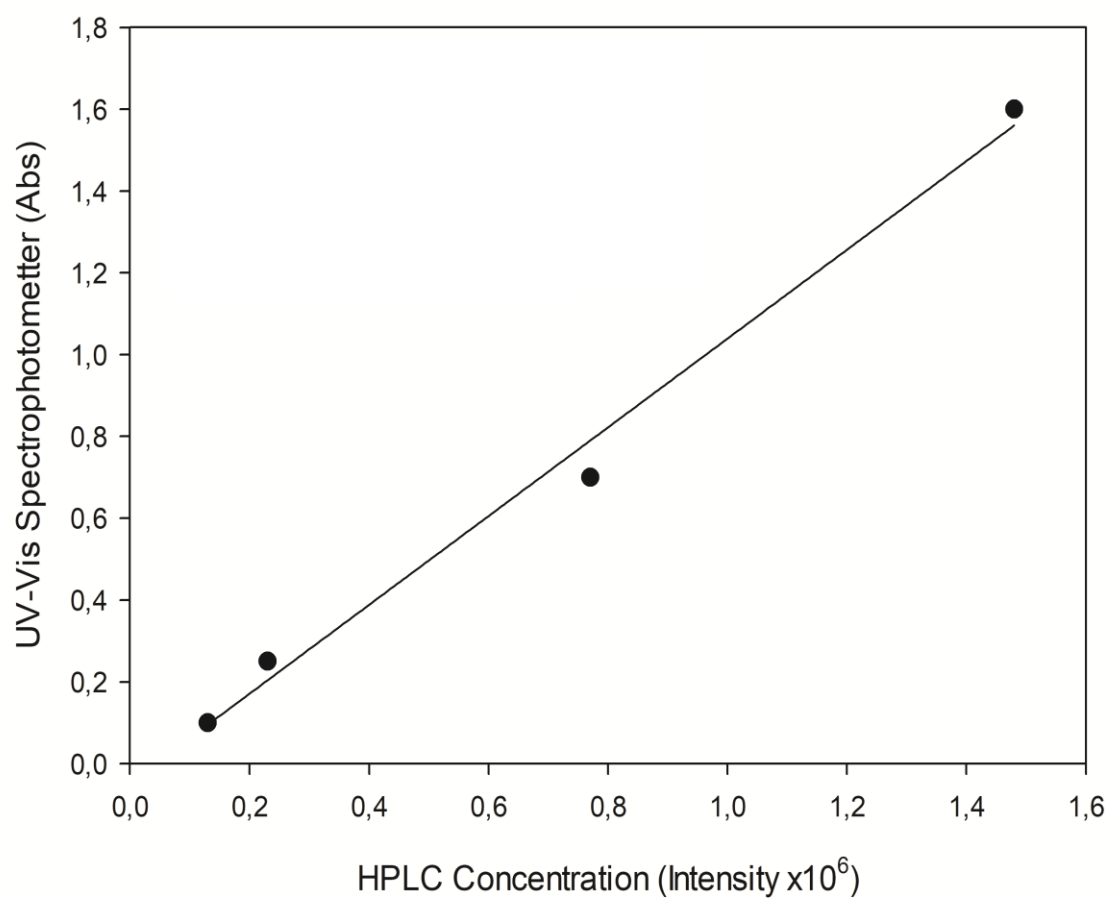

|                         |                    |                   |                                   |          |                                      |                              |
|-------------------------|--------------------|-------------------|-----------------------------------|----------|--------------------------------------|------------------------------|
| Equation:<br>f = y0+a*x |                    |                   |                                   |          | Statistical Tests:                   |                              |
| <b>R</b>                | <b>Rsqr</b>        | <b>Adj Rsqr</b>   | <b>Standard Error of Estimate</b> |          | <b>Normality Test (Shapiro-Wilk)</b> |                              |
| 0,9957                  | 0,9914             | 0,9871            | 0,0768                            |          | Passed (P = 0,1849)                  |                              |
|                         | <b>Coefficient</b> | <b>Std. Error</b> | <b>t</b>                          | <b>P</b> |                                      |                              |
| y0                      | -0,0458            | 0,0605            | -0,7567                           | 0,5282   |                                      |                              |
| a                       | 1,0855             | 0,0716            | 15,1563                           | 0,0043   | W Statistic= 0,8363                  | Significance Level = <0,0001 |

**Figure S4.** Correlation plots between UV-Vis Spectrophotometers Absorbance values and HPLC concentration expressed as intensity.

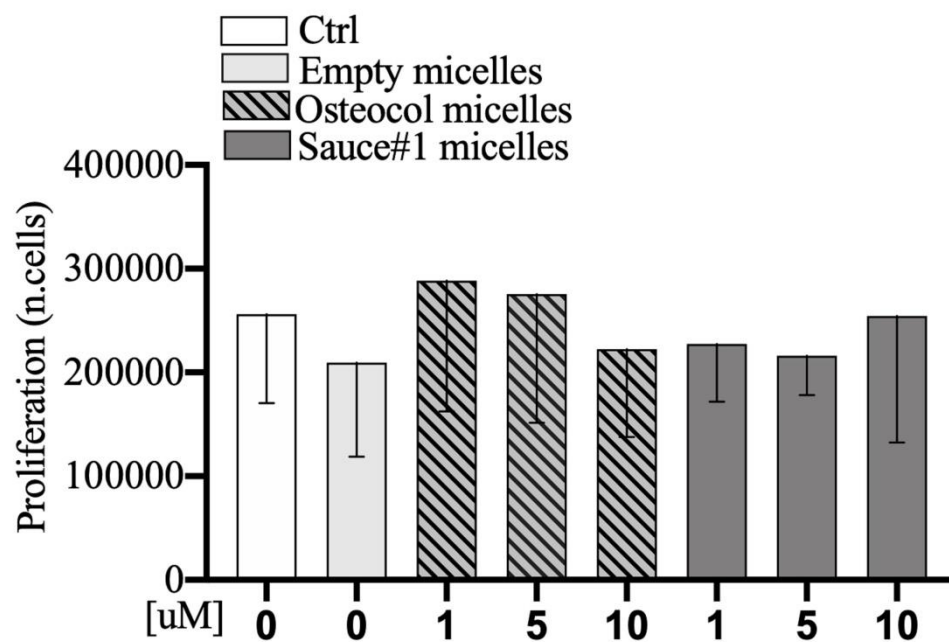

**Figure S5.** Cell proliferation in vitro test. All data are mean of three different experiment  $\pm$  standard deviation.

| Sample 50g/100mL | EXTRACT (mg) | HPLC Data      |               | UV/Vis Spectrophotometer data |                |               |
|------------------|--------------|----------------|---------------|-------------------------------|----------------|---------------|
|                  |              | Lycopene (ppm) | Lycopene %W/W | Abs <sub>472 nm</sub>         | Lycopene (ppm) | Lycopene %W/W |
| Osteocol®        | 10.5         | 325.233        | 16.26         | 1.918                         | 385            | 19.24         |
| Sauce #1         | 10.1         | 328.812        | 16.44         | 1.725                         | 344            | 17.19         |
| Sauce #2         | 21.5         | 317.845        | 15.89         | 1.600                         | 326            | 16.29         |
| Sauce #3         | 10.2         | 295.014        | 14.75         | 1.359                         | 276            | 13.79         |
| Sauce #4         | 23           | 254.308        | 12.7          | 1.348                         | 274            | 13.68         |
| Sauce #5         | 13.9         | 246.393        | 12.32         | 1.159                         | 235            | 11.75         |
